# Supplementary material for: Covalent organic frameworks with interlayer fixed Pt atoms for efficient electrocatalytic hydrogen evolution
Source: Royal Society of Chemistry journal article supplement (doi:10.1039/d3qm01133j), 2024-01-01
Supplement: d3qm01133j1.pdf [file d3qm01133j1.pdf]

## Supporting information

# Covalent Organic Frameworks with Interlayer Fixed Pt Atoms for Efficient Electrocatalytic Hydrogen Evolution

*Daqing Fan, Weiwen Wang, Tian Ma, Xianglin Luo, Chao He\*, Xikui Liu\*, and Shuang Li\**

D. Fan, W. Wang, Dr. T. Ma, Prof. X. Luo, Dr. C. He, Prof. X. Liu, and Prof. S. Li  
College of Polymer Science and Engineering, State Key Laboratory of Polymer  
Materials Engineering, Sichuan University, Chengdu 610065, China  
E-mail: shuang.li@scu.edu.cn

## Supplementary Experiment Sections

### 1. Materials

All chemicals and reagents were analytical grade or better and used without further purification, and ultrapure water was used throughout all experiments. 2,4,6-tris(4-aminophenyl)-1,3,5-triazine(TAPTA), 1,3,5-benzenetricarbaldehyde were purchased from Alfa Aesar and used as received. Tetrahydrofuran, 1,4-Dioxane, 1,3,5-Trimethylbenzene, and glacial acetic acid were purchased from Aladdin. Chloroplatinic acid hydrate was purchased from Energy Chemical.

### 2. Synthetic procedure

**Synthesis of TTB-COF, TTB-COP.** The centrifuge tube was preloaded with 2,4,6-tris(4-aminophenyl)-1,3,5-triazine (70.9 mg) and 1,3,5-benzenetricarboxaldehyde (32.45 mg), respectively. Acetonitrile (10 ml) was then added, and the solution containing the building blocks was mixed well. Subsequently, 2 ml of glacial acetic acid was added and shaken vigorously for 6 hours at room temperature. The resulting yellow precipitate, collected by centrifugation, was washed

with anhydrous ethanol and 1,4-dioxane, respectively. The obtained precipitate was dispersed in a round-bottomed flask containing 1,4-dioxane (8 mL), trimethyl benzene (2 mL) (4:1 v/v), water, and glacial acetic acid. The resulting suspension was sealed and aged at 80 °C for 120h. By keeping the ratio of precursors constant, samples named TTB-COP were synthesized and employed for 72h. The yellow powder was collected by centrifugation washed several times with a large amount of tetrahydrofuran and dried under vacuum at 100 °C for 6 h.

**Synthesis of Pt@TTB-COF, Pt@TTB-COP.** 20 mg of  $\text{H}_2\text{PtCl}_4$  and 30 mg of TTB-COF(TTB-COP) were mixed in 30 ml of anhydrous ethanol. The mixture was heated to 60 °C with stirring and constant temperature for 6h.

### **3. Characterization**

The morphology of the as-prepared catalysts was observed by scanning electron microscopy (SEM, Apreo S HiVoc, Thermo Fisher Scientific) and transmission electron microscope (TEM, FEI Talos F200X). The phase composition was identified by a Dandong Haoyuan DX-2700BH X-ray diffractometer using  $\text{Cu K}\alpha$  radiation ( $\lambda = 0.15406$  nm). X-ray photoelectron Spectra (XPS) were measured on a K-Alpha X-ray photoelectron spectrometer system (Thermo Scientific) with a Hemispheric 180° dual-focus analyzer with a 128-channel detector. The X-ray monochromator was microfocused  $\text{Al K}\alpha$  radiation. For the measurement, the prepared powder samples were pressed and loaded on carbon taps and then pasted onto the sample holder for measurement. The data were collected with an X-ray spot size of 400  $\mu\text{m}$ , 20 scans for the survey, and 50 scans for the regions. Scanning transmission electron microscopy (STEM) images and electron energy loss spectroscopy (EELS) elemental mapping were acquired on a Cs-corrected (S)TEM (FEI Titan Cubed Themis G2 300). The X-ray absorption spectroscopy (XAS) measurements were recorded at the X-ray absorption spectroscopy beamline of the Australian Synchrotron (ANSTO) in fluorescence mode. The radiation was monochromatized by a Si (111) double-crystal monochromator. XANES and EXAFS data reduction and analysis were processed by Athena software.

### **4. Electrochemical Measurements.**

In a typical preparation of catalyst ink, the catalyst powder (10 mg) was blended with 100  $\mu\text{L}$  Nafion solution (5 wt%) and 900  $\mu\text{L}$  ethanol in an ultrasonic bath. 5  $\mu\text{L}$  of catalyst ink was then pipetted onto the glassy carbon (GC) surface, leading to a catalyst loading of  $\sim 0.254 \text{ mg/cm}^2$ . Commercially available 20 wt % Pt/C on carbon black was measured with the same loading amount for comparison.

All the electrochemical measurements were carried out in a conventional three-electrode cell using the Gamry reference 600 workstations (Gamry, USA) at room temperature. A commercial RHE electrode was used as the reference electrode, and the graphite rod was used as the counter electrode. The Ag/AgCl reference electrode calibrated with RHE in 0.5 M  $\text{H}_2\text{SO}_4$  was used as a reference electrode for long-term stability measurement. A glassy carbon (GC) RDE electrode with an area of  $0.196 \text{ cm}^2$  served as the substrate for the working electrode to evaluate the HER activities of various catalysts. The electrochemical experiments were conducted in an Ar-saturated 0.5 M  $\text{H}_2\text{SO}_4$  electrolyte. The HER polarization curves of different catalysts with real-time IR-corrected by Gamry reference 600 potentiostats at a resistance of 4.4 ohms. The RDE measurements were conducted at a rotating speed of 1600 rpm with a sweep rate of 10 mV/s.

Electrochemical impedance spectroscopy (EIS) was carried out with a potentiostatic EIS method with a DC voltage of  $-0.015 \text{ V}$  vs. RHE in an Ar-saturated 0.5 M  $\text{H}_2\text{SO}_4$  electrolyte from 100 kHz to 0.1 Hz with a 10 mV AC potential at 1600 rpm. The stability tests for the catalysts were conducted using chronopotentiometry at the constant working current densities of  $10 \text{ mA/cm}^2$ . Electrochemically active surface area (ECSA) was estimated by measuring the capacitance of the double layer at the solid-liquid interface with cyclic voltammetry. The measurement was performed in a potential window of 0.35–0.55 V vs. RHE, where the Faradic current on the working electrode was negligible. The series of scan rates ranging from 50 to  $300 \text{ mV s}^{-1}$  was applied to build a plot of the charging current density differences against the scan rate. The slope of the obtained linear curve was twice the double-layer capacitance (Cdl), which was used to estimate ECSA.

## Supplementary Figures.

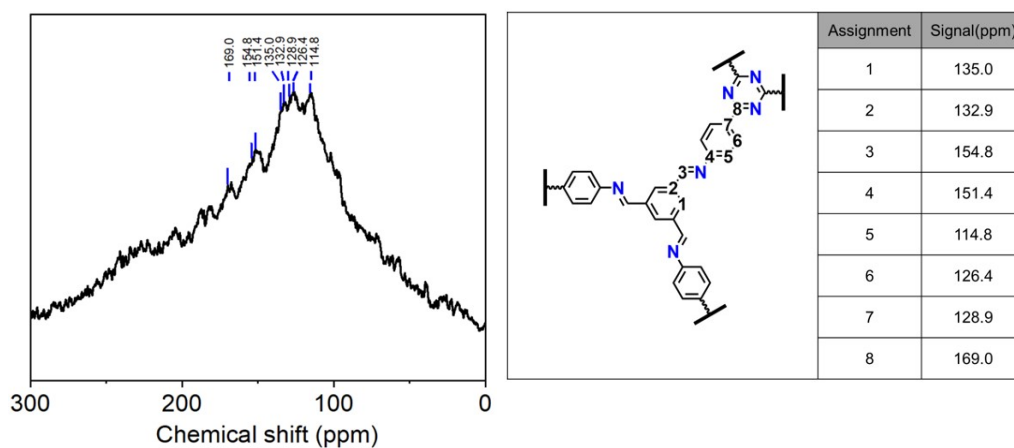

**Figure S1.**  $^{13}\text{C}$  CP-MAS solid-state NMR spectra of TTB-COF and molecular model of TTB-COF and  $^{13}\text{C}$  NMR spectrum peak assignment.

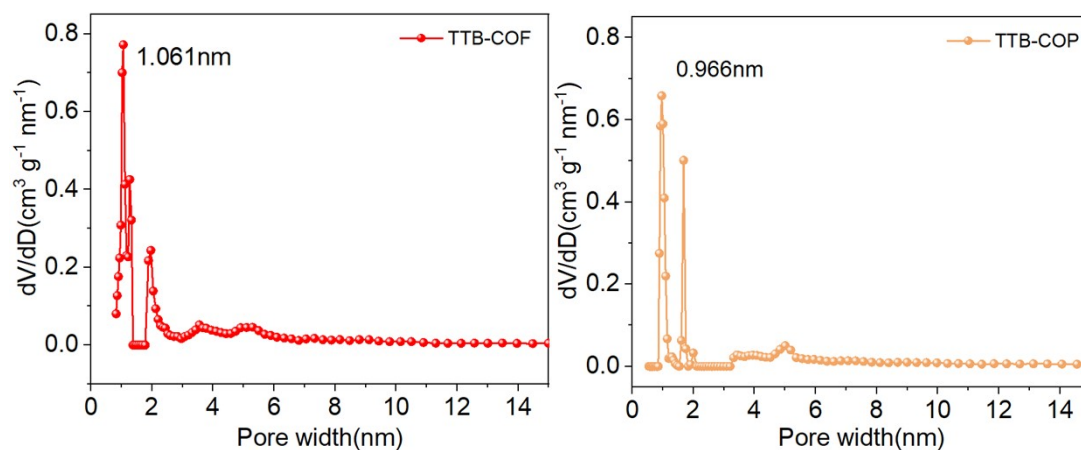

**Figure S2.** The distribution of pore sizes for TTB-COF and TTB-COP at 77K

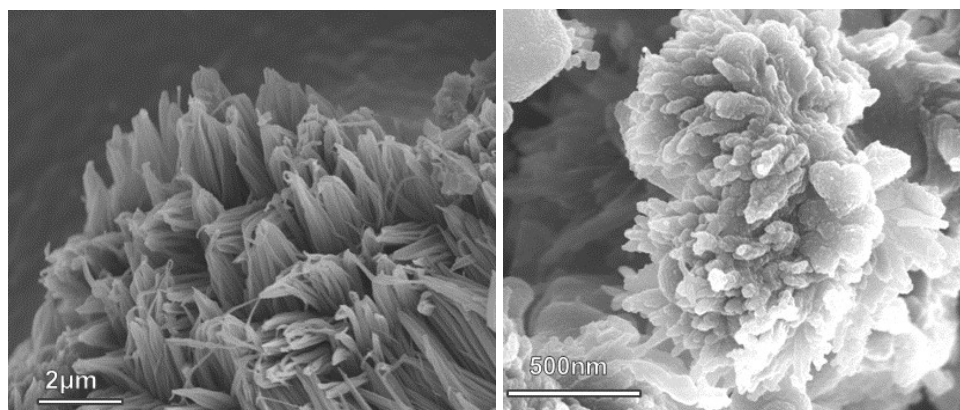

**Figure S3.** SEM images of Pt@TTB-COF, and Pt@TTB-COP.

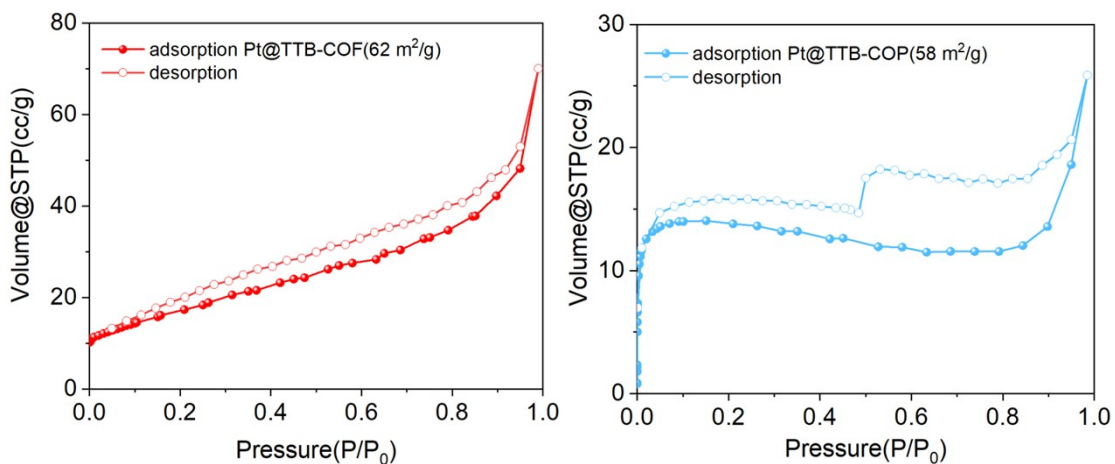

**Figure S4.**  $N_2$  sorption isotherms for Pt@TTB-COF and Pt@TTB-COP at 77K.

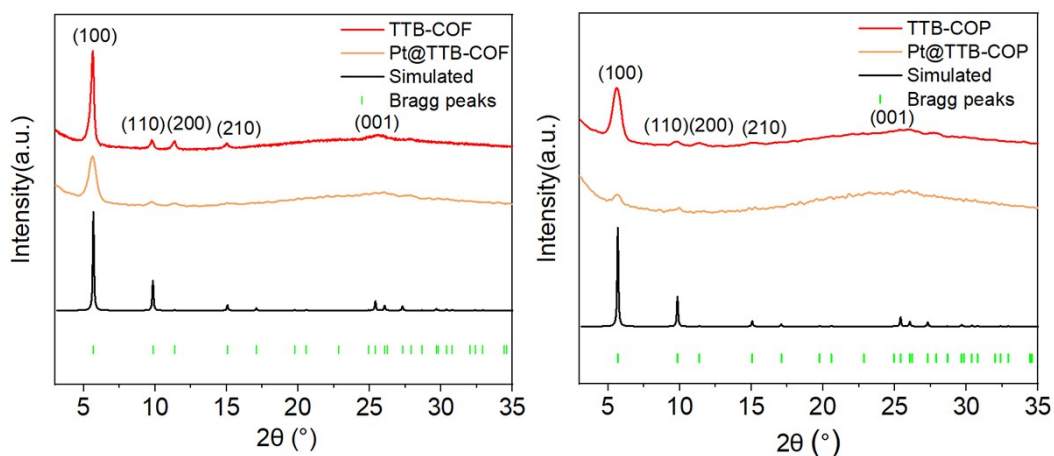

**Figure S5.** PXRD patterns and Pawley refinement of TTB-COF, Pt@TTB-COF, TTB-COP, and Pt@TTB-COP.

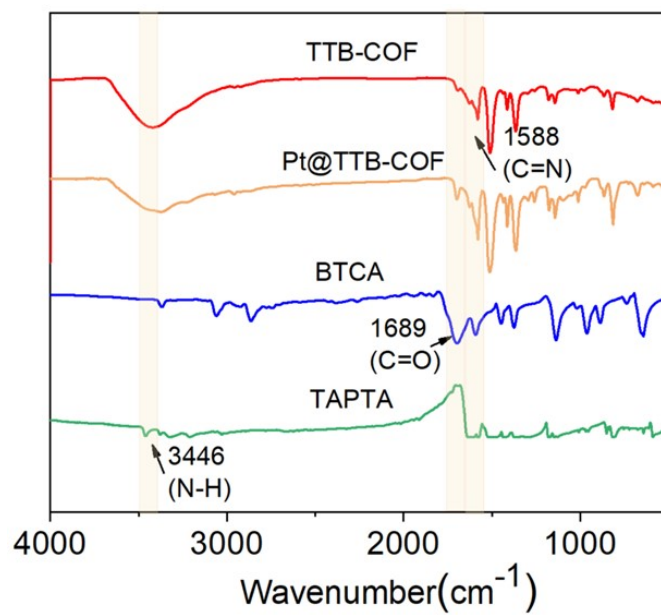

**Figure S6.** The FTIR spectra of TTB-COF and its corresponding monomers.

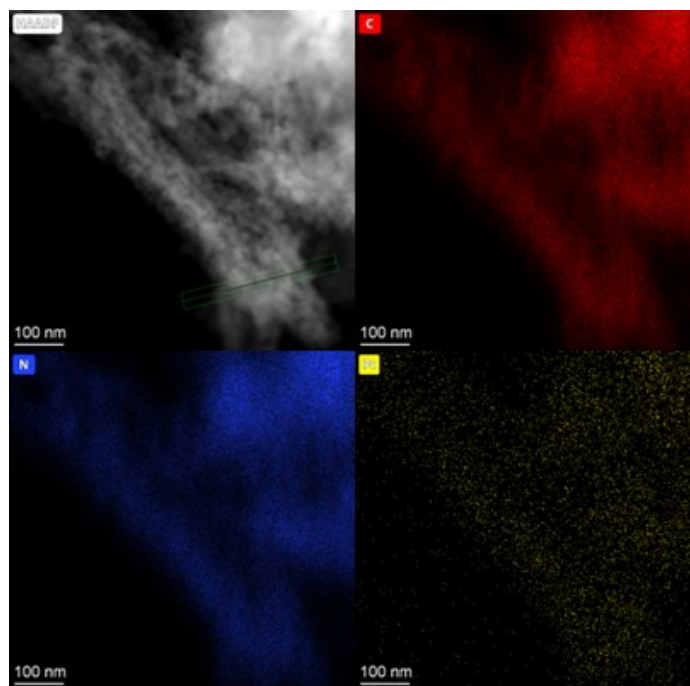

**Figure S7.** The element mapping of C, N, and Pt for Pt@TTB-COF

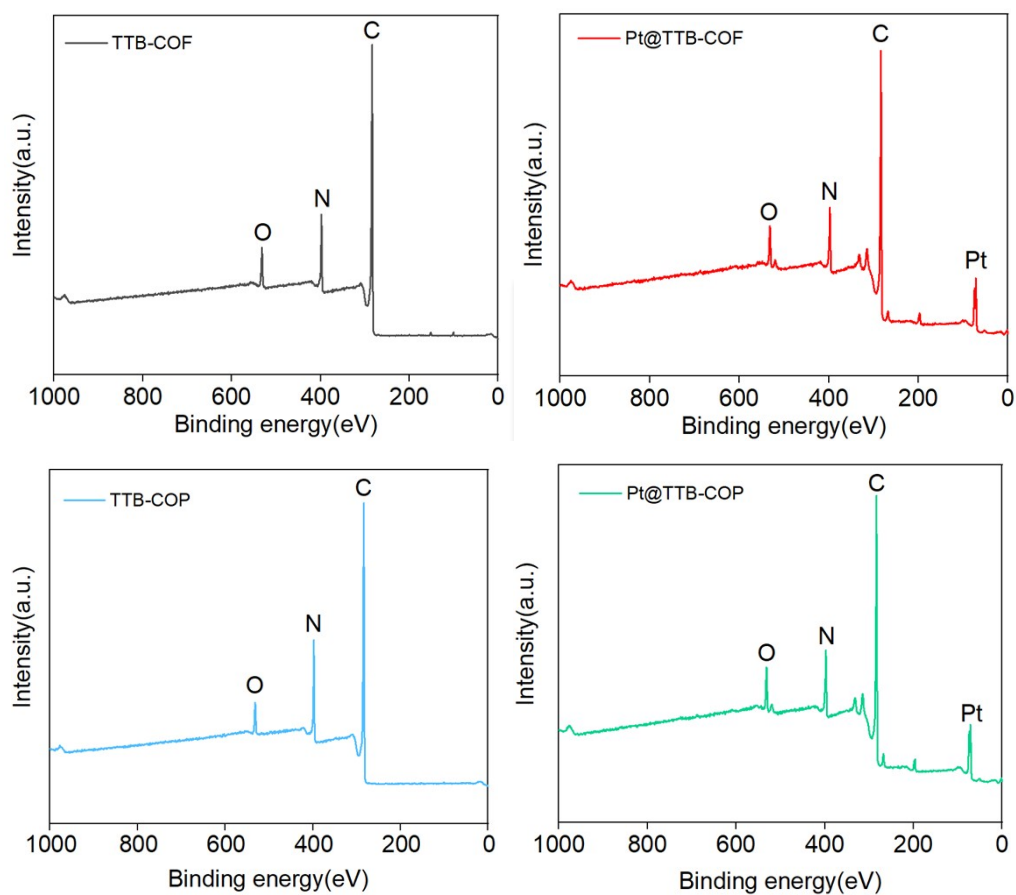

**Figure S8.** XPS wide-scan survey of TTB-COF, Pt@TTB-COF, TTB-COP and Pt@TTB-COP.

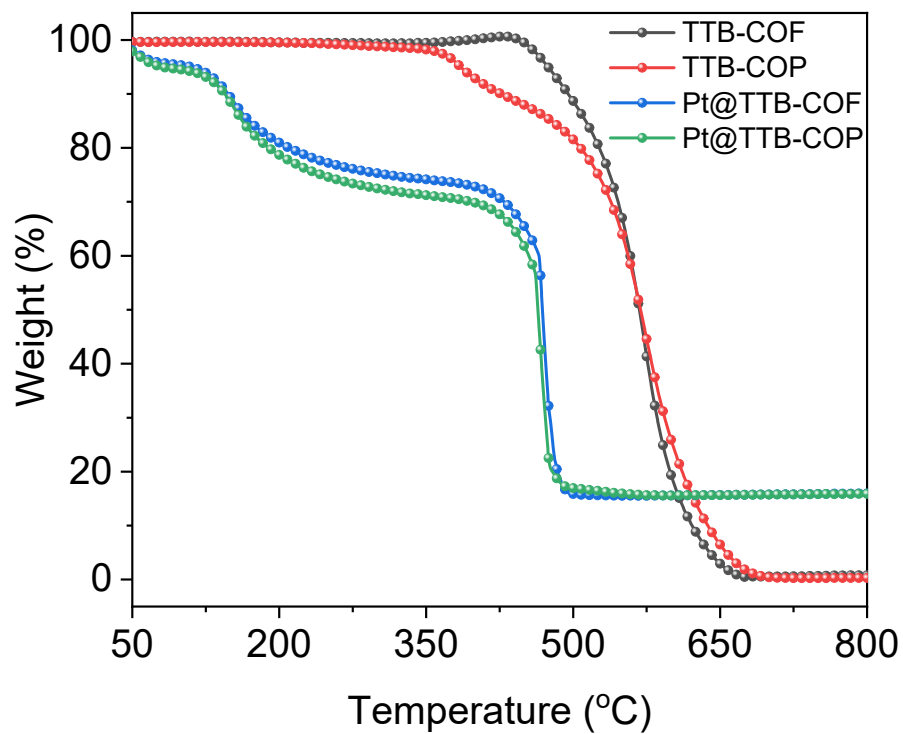

**Figure S9.** TGA analysis of the TTB-COF, TTB-COP, Pt@TTB-COF, and Pt@TTB-COP measured in air.

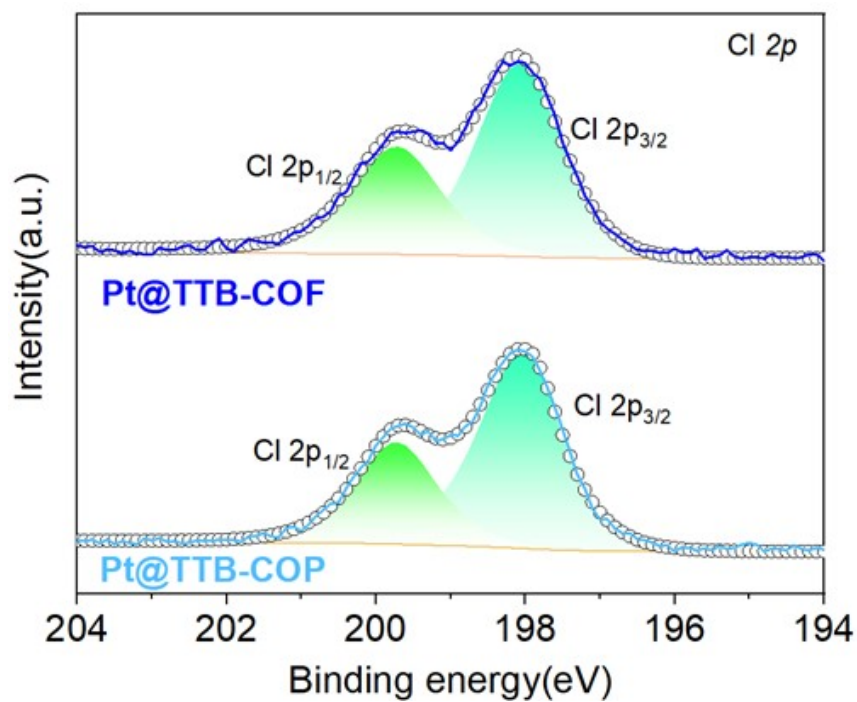

**Figure S10.** Cl 2p XPS spectra of Pt@TTB-COF and Pt@TTB-COP.



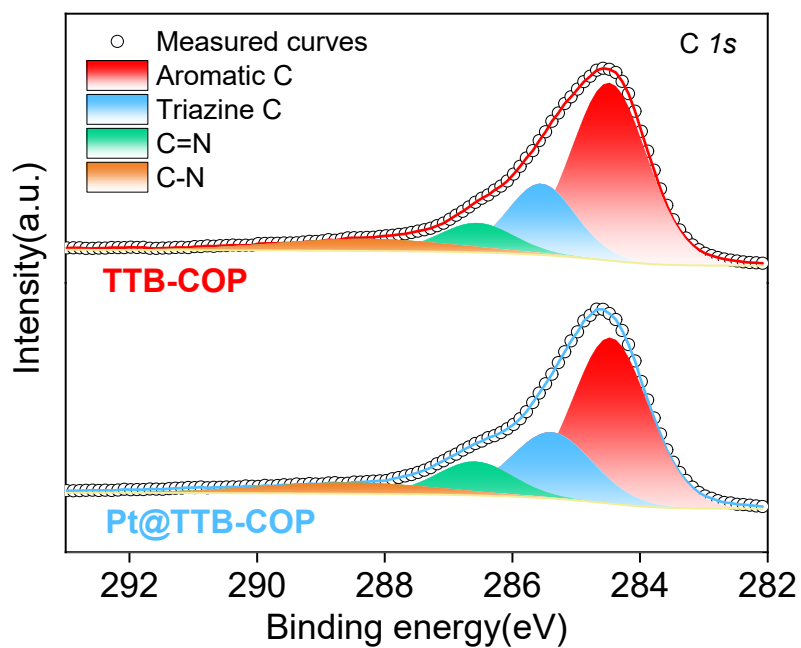

**Figure S11.** C 1s XPS spectra of TTB-COP and Pt@TTB-COP.

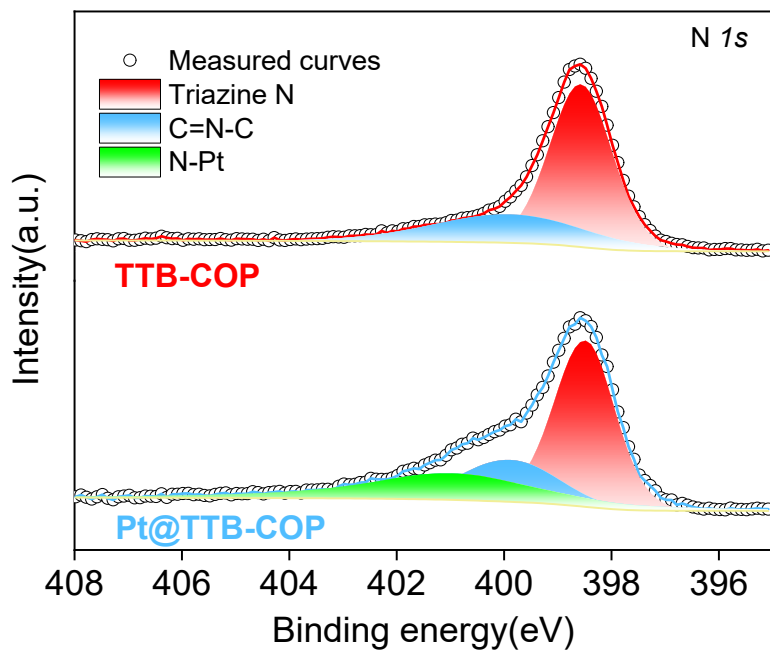

**Figure S12.** N 1s XPS spectra of TTB-COP and Pt@TTB-COP.

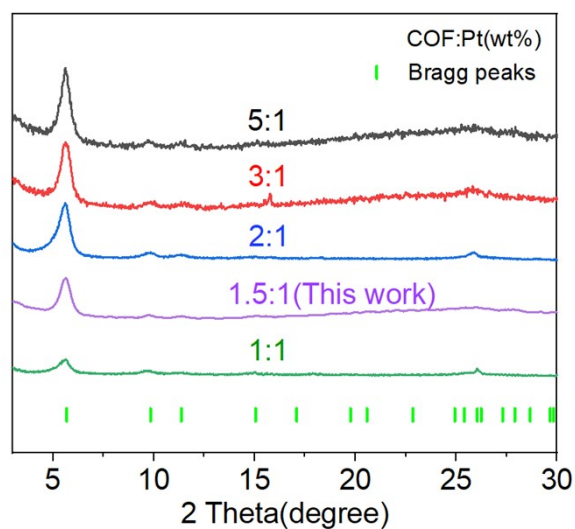

**Figure S13.** PXRD images of different Pt complexation ratios.

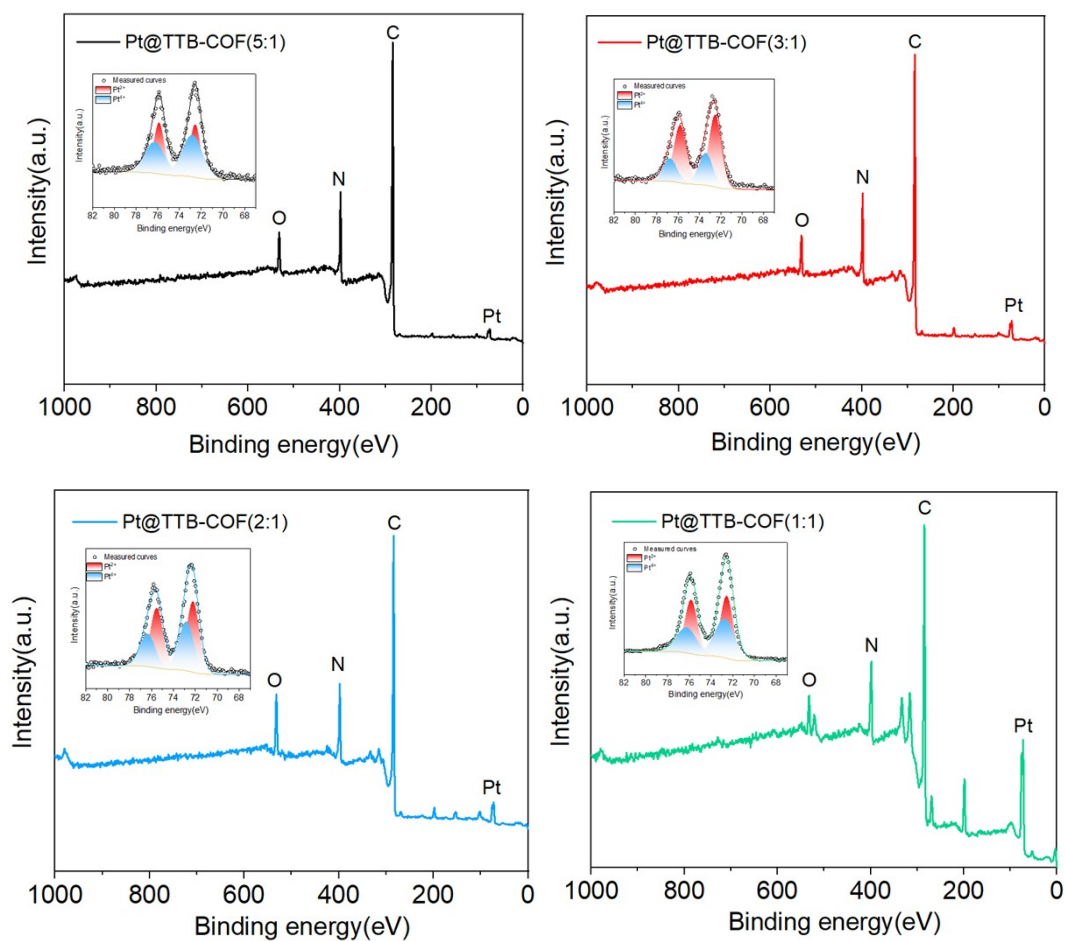

**Figure S14.** XPS wide-scan survey of Pt@TTB-COF(COF:Pt=5:1); Pt@TTB-COF(COF:Pt=3:1); Pt@TTB-COF(COF:Pt=2:1); Pt@TTB-COF(COF:Pt=1:1).

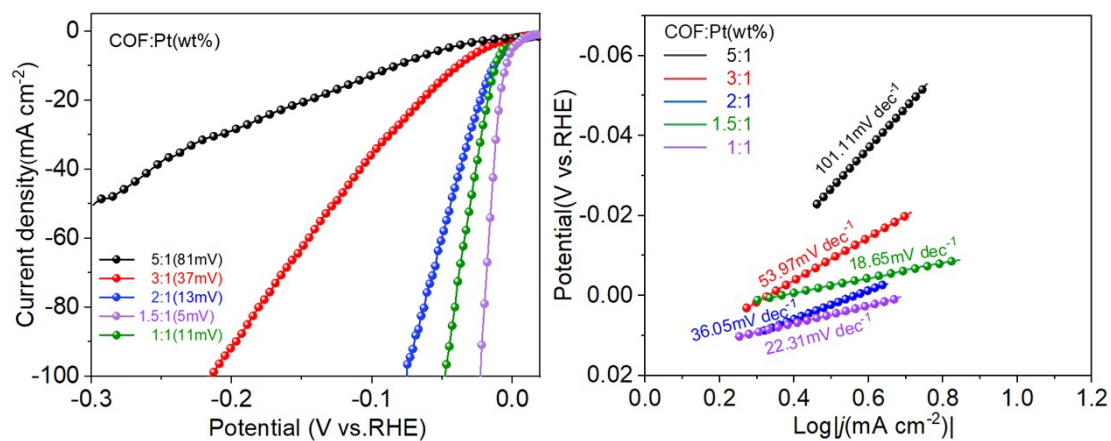

**Figure S15.** LSV polarization curves and corresponding Tafel slopes for Pt@TTB-COF different Pt content ratios.

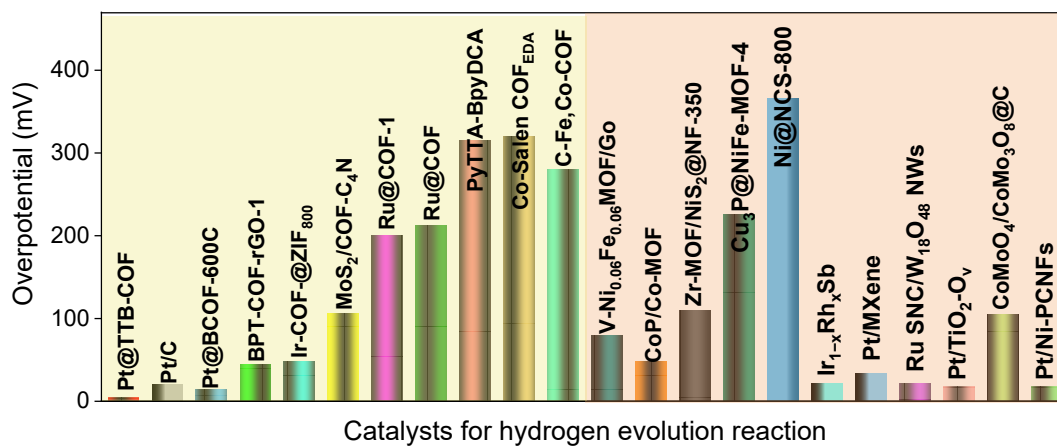

**Figure S16.** Comparison of the HER activity of Pt@TTB-COF and other previously reported materials.

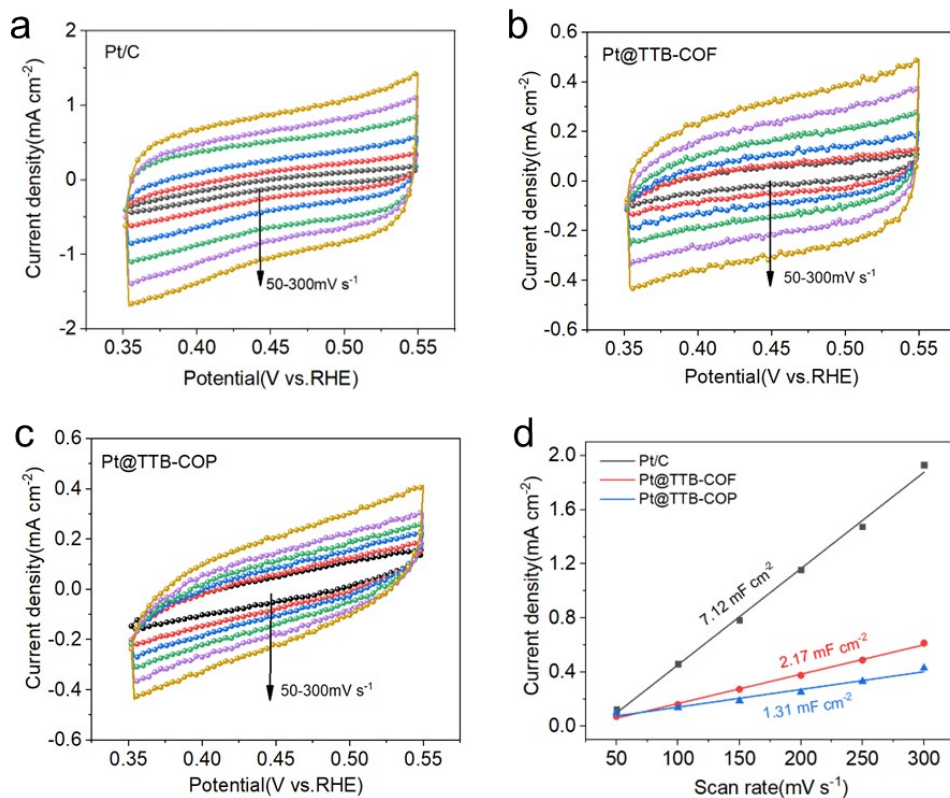

**Figure S17.** CV curves of a) Pt/C, b) Pt@TTB-COF, and c) Pt@TTB-COP under different scan rates. d)  $C_{dl}$  plots extrapolated from the CV curves.

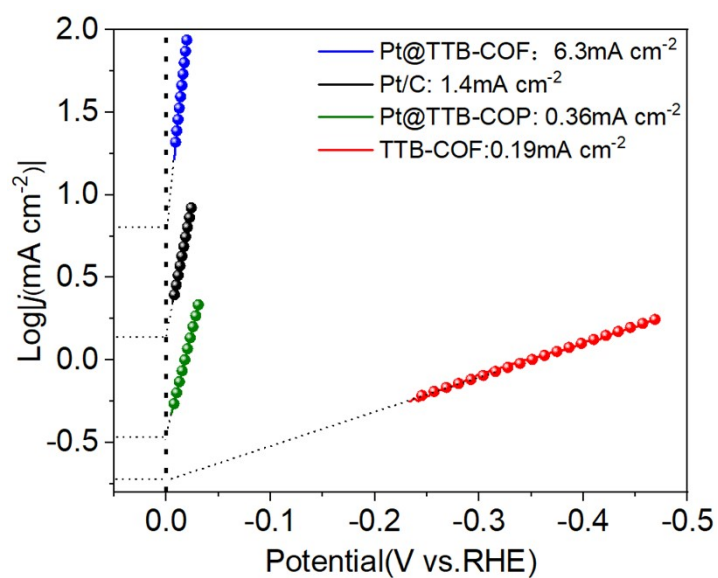

**Figure S18.** Exchange current density images and values for Pt@TTB-COF, Pt/C, etc.

**Table S1.** XPS measurements of TTB-COF, Pt@TTB-COF, TTB-COP and Pt@TTB-COP (wt%).

|            | C     | N     | O    | Pt    | Cl    |
|------------|-------|-------|------|-------|-------|
| TTB-COF    | 76.82 | 15.41 | 7.77 |       |       |
| Pt@TTB-COF | 59.89 | 11.69 | 6.68 | 15.78 | 5.96  |
| TTB-COF    | 76.12 | 17.48 | 6.40 |       |       |
| Pt@TTB-COP | 55.32 | 12.00 | 6.60 | 15.36 | 10.73 |

**Table S2.** XPS measurements of TTB-COF, Pt@TTB-COF, TTB-COP, and Pt@TTB-COP (at%).

|            | C     | N     | O    | Pt   | Cl   |
|------------|-------|-------|------|------|------|
| TTB-COF    | 80.14 | 13.78 | 6.08 |      |      |
| Pt@TTB-COF | 76.86 | 12.87 | 6.43 | 1.25 | 2.59 |
| TTB-COF    | 79.36 | 15.63 | 5.01 |      |      |
| Pt@TTB-COP | 73.62 | 13.69 | 6.59 | 1.26 | 4.84 |

**Table S3.** EXAFS fitting parameters at the Pt  $L_3$ -edge for various samples ( $S_0^2=0.61$ ).

| Sample            | Shell | $N^a$ | $R(\text{\AA})^b$ | $\sigma^2(\text{\AA}^2)^c$ | $\Delta E_0(\text{eV})^d$ | $R$ factor |
|-------------------|-------|-------|-------------------|----------------------------|---------------------------|------------|
| Pt@TTB-COF        | Pt-N  | 1.0   | 1.97              | 0.0021                     | 8.763                     | 0.0178     |
|                   | Pt-Cl | 3.0   | 2.29              | 0.0047                     |                           |            |
| Pt foil           | Pt-Pt | 12.0  | 2.76              | 0.0043                     | 8.423                     | 0.0029     |
| PtCl <sub>4</sub> | Pt-Cl | 4.0   | 2.28              | 0.0041                     | 2.415                     | 0.0036     |

<sup>a</sup> $N$ : coordination numbers; <sup>b</sup> $R$ : bond distance; <sup>c</sup> $\sigma^2$ : Debye-Waller factors; <sup>d</sup> $\Delta E_0$ : the inner potential correction.  $R$  factor: goodness of fit.  $S_0^2$  was set to 0.61, according to the experimental EXAFS fit of Pt foil by fixing CN as the known crystallographic value.

**Table S4.** Summary of recently reported COF or MOF-based HER catalysts in acidic electrolyte.

| No | Year      | Material | Feature                                  | Performance                                                | Ref                                                                |
|----|-----------|----------|------------------------------------------|------------------------------------------------------------|--------------------------------------------------------------------|
| 1  | This work | COF      | Pt@TTB-COF                               | 0.5M H <sub>2</sub> SO <sub>4</sub> , $\eta_{10}$ : 5mV    | This work                                                          |
| 2  | 2022      | COF      | Pt@BCOF-600C                             | 0.5M H <sub>2</sub> SO <sub>4</sub> , $\eta_{10}$ : 14.5mV | <i>J. Am. Chem. Soc.</i> <b>2022</b> , 144, 43, 19973–19980        |
| 3  | 2022      | COF      | BPT-COF-rGO-1                            | 0.5M H <sub>2</sub> SO <sub>4</sub> , $\eta_{10}$ : 45mV   | <i>Angew. Chem. Int. Ed.</i> <b>2022</b> , 61, e202113067          |
| 4  | 2022      | COF      | Ir-COF@ZIF <sub>800</sub>                | 0.5M H <sub>2</sub> SO <sub>4</sub> , $\eta_{10}$ : 48mV   | <i>Chem. Commun.</i> , <b>2022</b> , 58, 13214–13217               |
| 5  | 2023      | COF      | N-MoS <sub>2</sub> /COF-C <sub>4</sub> N | 0.5M H <sub>2</sub> SO <sub>4</sub> , $\eta_{10}$ : 106mV  | <i>Catalysts</i> <b>2023</b> , 13, 90                              |
| 6  | 2022      | COF      | Ru@COF-1                                 | 0.5M H <sub>2</sub> SO <sub>4</sub> , $\eta_{10}$ : 200mV  | <i>Small</i> <b>2022</b> , 18, 2107750                             |
| 7  | 2022      | COF      | PyTTA-BPyDCA                             | 0.5M H <sub>2</sub> SO <sub>4</sub> , $\eta_{10}$ : 315mV  | <i>Nat Commun</i> 13, 1411 (2022)                                  |
| 8  | 2022      | COF      | Co-Salen COF <sub>EDA</sub>              | 0.5M H <sub>2</sub> SO <sub>4</sub> , $\eta_{10}$ : 320mV  | <i>Adv. Sci.</i> <b>2022</b> , 9, 2105912                          |
| 9  | 2020      | COF      | Ru@COF                                   | 1.5M H <sub>2</sub> SO <sub>4</sub> , $\eta_{10}$ : 212mV  | <i>ChemNanoMat</i> <b>2020</b> , 6, 99–106                         |
| 10 | 2023      | MOF      | Zr-MOF/NiS <sub>2</sub> @NF-350          | 0.5M H <sub>2</sub> SO <sub>4</sub> , $\eta_{10}$ : 110mV  | <i>Journal of Colloid and Interface Science</i> 640 (2023) 820–828 |
| 11 | 2022      | MOF      | Cu <sub>3</sub> P@NiFe-MOF-4             | 0.5M H <sub>2</sub> SO <sub>4</sub> , $\eta_{10}$ : 226mV  | <i>Catalysis Letters</i> (2022) 152:3825–3832                      |
| 12 | 2023      | MOF      | Ni@NCS-800                               | 0.5M H <sub>2</sub> SO <sub>4</sub> , $\eta_{10}$ : 366mV  | <i>Applied Surface Science</i> 616 (2023) 156499                   |
| 13 | 2022      | Other    | Ir <sub>1-x</sub> Rh <sub>x</sub> Sb     | 0.5M H <sub>2</sub> SO <sub>4</sub> , $\eta_{10}$ : 22mV   | <i>Adv. Energy Mater.</i> <b>2022</b> , 12, 2200855                |
| 14 | 2022      | Other    | Pt/MXene                                 | 0.5M H <sub>2</sub> SO <sub>4</sub> , $\eta_{10}$ : 34mV   | <i>Adv. Funct. Mater.</i> <b>2022</b> , 32, 2110910                |
| 15 | 2023      | Other    | Pt/TiO <sub>2</sub> -O <sub>v</sub>      | 0.5M H <sub>2</sub> SO <sub>4</sub> , $\eta_{10}$ : 18mV   | <i>Angew. Chem. Int. Ed.</i> <b>2023</b> , 62, e202300406          |
